# Supplementary material for: Excellent oxygen evolution reaction of NiO with a layered nanosphere structure as the cathode of lithium–oxygen batteries
Source: Royal Society of Chemistry journal article supplement (doi:10.1039/c7ra12630a), 2018-01-01
Supplement: c7ra12630a1.pdf [file c7ra12630a1.pdf]

## Supporting information

### Excellent Oxygen Evolution Reaction of NiO with Layered Nanosphere as the Lithium-Oxygen Batteries Cathode

Hongyu Dong,<sup>\*abc</sup> Panpan Tang,<sup>abc</sup> Shiquan Zhang,<sup>abc</sup> Xinglu Xiao,<sup>abc</sup> Cheng Jin,<sup>abc</sup> Yicong Gao,<sup>abc</sup>  
Yanhong Yin,<sup>abc</sup> Bing Li<sup>\*d</sup> and Shuting Yang<sup>\*abc</sup>

<sup>a</sup> College of Chemistry and Chemical Engineering, Henan Normal University, Xinxiang 453007,  
China

<sup>b</sup> National & Local Engineering Laboratory for Motive Power and Key Materials, Xinxiang 453000,  
China

<sup>c</sup> Collaborative Innovation Center of Henan Province for Motive Power and Key Materials,  
Xinxiang 453000, China

<sup>d</sup> Clean Energy Automotive Engineering Center, Tongji University, Shanghai 201804 China

\*Corresponding Author. Tel.: (+86)-373-3326439

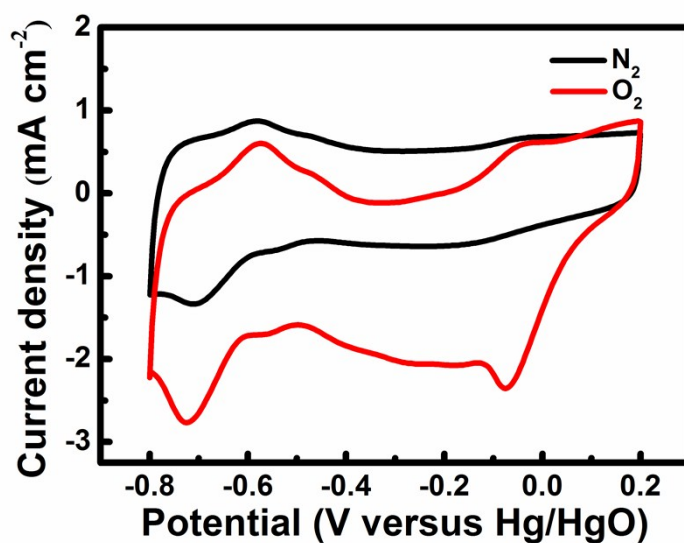

Figure S1 Cyclic voltammograms of Pt/C (loading  $\sim 0.1 \text{ mg cm}^{-2}$ ) at a rate of  $50 \text{ mV s}^{-1}$ .

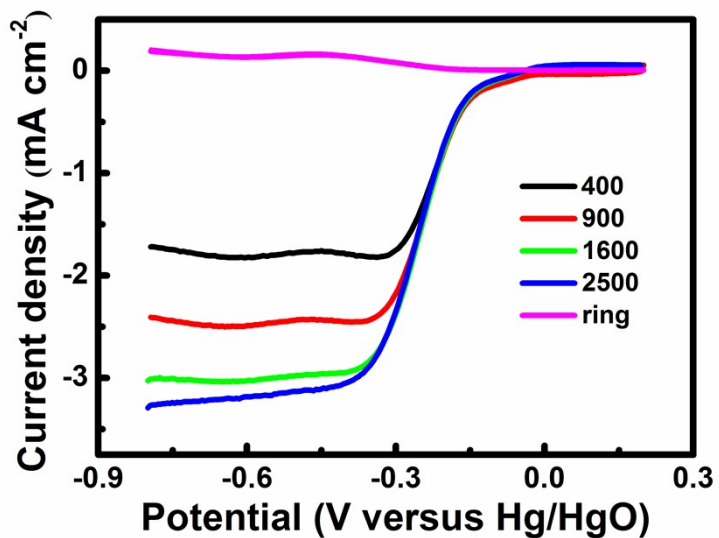

Figure S2 Oxygen reduction reaction curves of NiO with RRDE at a rotation rate of 400 rpm, 900 rpm, 1600 rpm and 2500 rpm with scanning rate of  $\text{mV s}^{-1}$ .

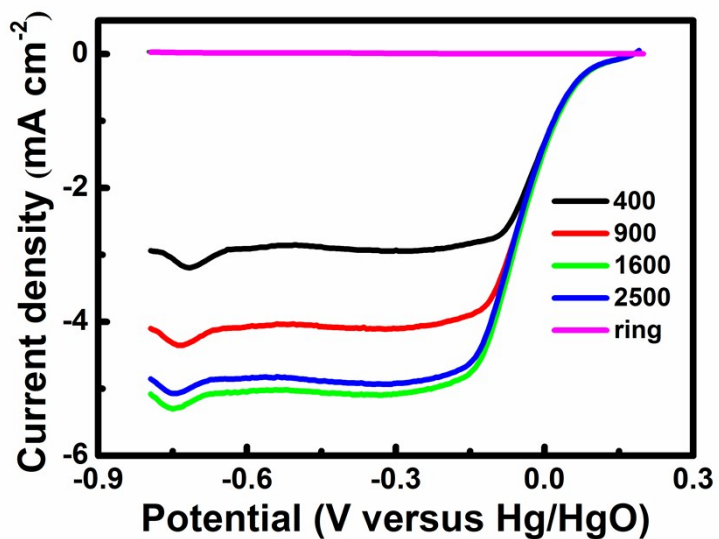

Figure S3 Oxygen reduction reaction curves of Pt/C with RRDE at a rotation rate of 400 rpm, 900 rpm, 1600 rpm and 2500 rpm with scanning rate of  $10 \text{ mV s}^{-1}$ .
